# Supplementary material for: Naegleria fowleri Cathepsin B Induces a Pro-Inflammatory Immune Response in BV-2 Microglial Cells via NF-κB and AP-1 Dependent-MAPK Signaling Pathway
Source: MDPI journal article supplement (doi:10.3390/ijms23158388), 2022-07-29
Supplement: s1 [file s1]

**Table S1. Primer sequences used in the study**

| Gene          | Primer sequences                                                                         |
|---------------|------------------------------------------------------------------------------------------|
| TLR-2         | Forward: 5'-TGCTTTCCTGCTGGAGATTT -3'<br>Reverse: 5'-TGTAACGCAACAGCTTCAGG-3'              |
| TLR-3         | Forward: 5'-CCCCCTTTGAACTCCTCTTC-3'<br>Reverse: 5'-TTTCGGCTTCTTTTGATGCT-3'               |
| TLR-4         | Forward: 5'-GCATGGCTTACACCACCTCT-3'<br>Reverse: 5'-GTGCTGAAAATCCAGGTGCT-3'               |
| MyD88         | Forward: 5'-GCTGCTGGCCTTGTTAGACCGTGA-3'<br>Reverse: 5'-GACGTCACGGTCGGACACACACAAC-3'      |
| TNF- $\alpha$ | Forward: 5'-CATCCTCTCAAAATTCGAGTGACA-3'<br>Reverse: 5'-TGGGAGTAGACAAGGTACAACCC-3'        |
| IL-1 $\alpha$ | Forward: 5'-ATGGCCAAAGTTCCTGACTT-3'r<br>Reverse: 5'-TGGTCTTCTCCTTGAGCGCT-3'              |
| IL-1 $\beta$  | Forward: 5'-TGCAGAGTTCCCCAACTGGTACAT-3'<br>Reverse: 5'-GTGCTGCCTAATGTCCCCTTGAAT-3'       |
| IL-6          | Forward: 5'-CCGGAGAGGAGACTTCACAG-3'<br>Reverse: 5'-GGAAATTGGGGTAGGAAGGA-3'               |
| iNOS          | Forward: 5'-AATGGCAACATCAGGTCGGCCATCACT-3'<br>Reverse: 5'-GCTGTGTGTCACAGAAGTCTCGAACTC-3' |
| GAPDH         | Forward: 5'-ACCAGAGTCCATGCCATCAC-3'<br>Reverse: 5'-CACCACCCTGTTGCTGTAGCC-3'              |
